# Supplementary material
Source: Springer Nature journal article supplement (https://www.springermedizin.de/resource/supplementary/12936_2013_2946_MOESM4_ESM.docx/9544690)
Supplement: MOESM4 [file 9544690]

| **Table 4. Summary of barriers to IPTp uptake identified in study** | | | |
| --- | --- | --- | --- |
| **Behavioral and Environmental Barriers to IPTp Uptake** | **Individual and Family** | **Community** | **Environment** |
| Knowledge & beliefs of cause and symptoms of malaria | * | * | — |
| Knowledge & beliefs of risks of MIP | ** | ** | — |
| Understanding of IPT | *** | *** | — |
| Husband’s/ community’s support for accessing routine ANC | * | * | — |
| Husband’s/ community’s support for accessing MIP care | ** | ** |  |
| Costs of seeking care | * | — | * |
| Waiting time | — | — | ** |
| Provider attitudes | — | — | ** |
| Provider knowledge of MIP | — | — | ** |
| Provider training in MIP and focused ANC | — | — | ** |
| Provider knowledge of IPTp protocols | — | — | *** |
| Availability of SP on-site | — | — | *** |
